# Supplementary material
Source: publisher figshare collection journal article supplement (https://frontiersin.figshare.com/ndownloader/files/19749356)
Supplement: Supplementary file 1 [file 19749356]

## Sheet: Caterpillar_MPD
CaterpillarSpecies	Specialist	Hosts	MPD	db
Acronicta americana	no	1	0	generalist
Acronicta impleta	no	1	0	generalist
Acronicta retardata	yes	1	0	specialist
Nola triquetrana	yes	1	0	specialist
Parallelia bistriaris	yes	1	0	specialist
Pyreferra hesperidago	yes	1	0	specialist
Speranza pustularia	yes	1	0	specialist
Catocala ilia	yes	2	23.5533	specialist
Achatia distincta	no	22	173.552	generalist
Schizura unicornis	no	5	179.414	generalist
Morrisonia latex	no	8	187.884	generalist
Himella intractata	no	14	196.75	generalist
Alsophila pometaria	no	8	197.879	generalist
Nematocampa resistaria	no	18	198.926	generalist
Cladara atroliturata	no	10	201.461	generalist
Lithophane antennata	no	10	203.53	generalist
Hypagyrtis unipunctata	no	10	204.25	generalist
Ennomos subsignaria	no	11	204.522	generalist
Prochoerodes lineola	no	11	204.754	generalist
Amphipyra pyramidoides	no	10	205.236	generalist
Morrisonia confusa	no	40	205.557	generalist
Heterocampa biundata	no	7	210.917	generalist
Ectropis crepuscularia	no	15	211.225	generalist
Orgyia leucostigma	no	16	211.337	generalist
Crocigrapha normani	no	14	217.817	generalist
Dryocampa rubicunda	yes	2	225.382	specialist
Iridopsis ephyraria	no	21	237.931	generalist
Melanolophia canadaria	no	28	239.13	generalist
Malacosoma disstria	no	27	241.854	generalist
Orthosia rubescens	no	34	245.408	generalist
Nemoria	no	2	247.469	generalist
Lymantria dispar	no	37	251.532	generalist
Eutrapela clemataria	no	20	260.29	generalist
Phigalia titea	no	12	277.369	generalist
Eupithecia		22	296.126	generalist
Lambdina fiscellaria	no	8	328.848	generalist
Zale	no	6	348.424	generalist

## Sheet: Column_abbreviations
CaterpillarSpecies	caterpillar species
Specialist	is the caterpillar a specialist (yes/no)
Hosts	the number of hosts a caterpillar was found on
MPD	the mean phylogenetic distance of all recorded hosts (Ma)
db	the discrete diet breadth of the caterpillar
